# Supplementary material
Source: Springer Nature journal article supplement (https://www.springermedizin.de/resource/supplementary/13098_2010_80_MOESM2_ESM.pdf/9670474)

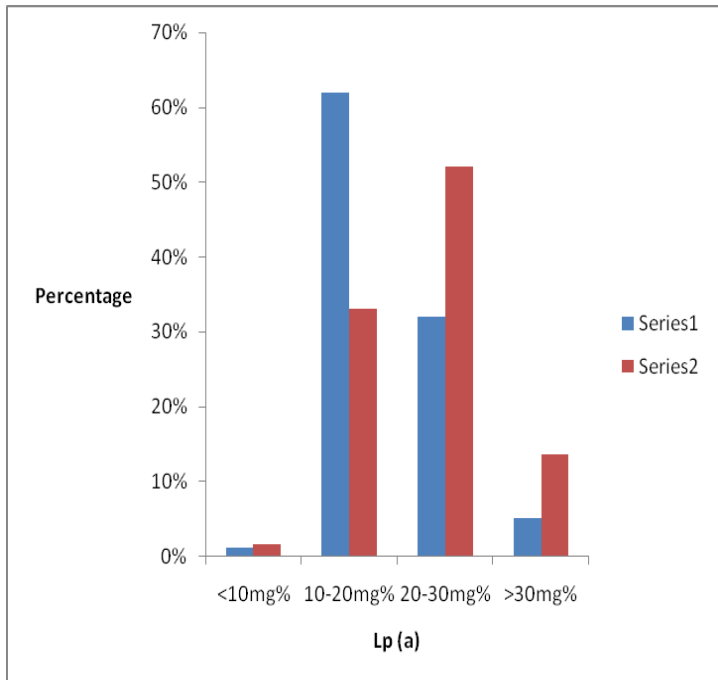

Series 1- Type 2 DM patients

Series 2- Control subjects

Supplement: MOESM2 [file 9670474]
